# Supplementary material
Source: PubMed Central journal article supplement (PMC4788004)
Supplement: iedr860122.w1_default.pdf [file iedr860122.w1_default.pdf]

## Advertisement placed in national newspapers

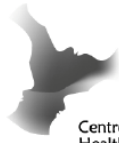

Centre for  
Health Communication

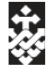

UNIVERSITY OF  
TECHNOLOGY SYDNEY

# → 100 PATIENTS/FAMILIES NEEDED TO TELL THEIR STORY

The Centre for Health Communication at the University of Technology Sydney, funded by the Australian Commission for Safety and Quality in Health Care, is looking for people to participate in a research project called the *100 Patient Stories Project*. If you or someone you know had something go wrong in hospital in the last 2 years and the hospital discussed this with you, we would like to hear your story.

To participate or for more information please contact:  
Suellen Allen (02) 9514 4789, [suellen.allen-1@uts.edu.au](mailto:suellen.allen-1@uts.edu.au) or  
Prof Rick Iedema (02) 9514 3833, [rick.iedema@uts.edu.au](mailto:rick.iedema@uts.edu.au) or  
visit our website [www.centreforhealthcom.org/100patients](http://www.centreforhealthcom.org/100patients)

UTS CRICOS PROVIDER CODE 00099F UTS269FASS
